# Supplementary material for: Inflammatory Markers as Predictors of Shunt Dependency and Functional Outcome in Patients with Aneurysmal Subarachnoid Hemorrhage
Source: MDPI journal article supplement (doi:10.3390/biomedicines11040997), 2023-03-23
Supplement: s1 [file s1]

**Supplemental file S1, Table S1**

**Predictors of shunt dependency (not reaching lower confidence limit of  $\geq 0.7$ )**

| Name           | Time   | EVD weaned - mean (SD) [n] | VP-shunt - mean (SD) [n] | AUC (95%CI)      | Cut-off | Sensitivity | Specificity |
|----------------|--------|----------------------------|--------------------------|------------------|---------|-------------|-------------|
| IL8            | Start  | 12.56 (1.04) [19]          | 10.44 (1.58) [12]        | 0.86 (0.69-1)    | 11.06   | 0.75        | 0.89        |
|                | End    | 12.4 (1.37) [19]           | 11.68 (1.24) [12]        | 0.66 (0.46-0.86) | 12.22   | 0.75        | 0.63        |
|                | Change | 0.01 (0.09) [19]           | -0.06 (0.09) [12]        | 0.74 (0.55-0.93) | -0.02   | 0.83        | 0.58        |
| VEGFA          | Start  | 9.96 (0.83) [19]           | 10.23 (1.11) [12]        | 0.56 (0.34-0.77) | 11.69   | 0.17        | 1.00        |
|                | End    | 9.38 (1.03) [19]           | 10.34 (0.83) [12]        | 0.83 (0.68-0.98) | 9.50    | 1.00        | 0.68        |
|                | Change | 0.04 (0.08) [19]           | 0 (0.08) [12]            | 0.68 (0.49-0.88) | 0.04    | 0.83        | 0.63        |
| CD8A           | Start  | 5.37 (1.1) [19]            | 5.11 (1.39) [12]         | 0.61 (0.4-0.83)  | 5.18    | 0.75        | 0.58        |
|                | End    | 4.98 (1.02) [19]           | 5.89 (0.54) [12]         | 0.76 (0.59-0.93) | 5.25    | 1.00        | 0.58        |
|                | Change | 0.02 (0.07) [19]           | -0.04 (0.08) [12]        | 0.73 (0.53-0.93) | -0.03   | 0.67        | 0.84        |
| MCP 3          | Start  | 5.76 (1.59) [17]           | 5.16 (1.91) [10]         | 0.68 (0.43-0.93) | 5.26    | 0.80        | 0.71        |
|                | End    | 5.54 (1.89) [18]           | 4.72 (1.45) [11]         | 0.62 (0.41-0.83) | 5.55    | 0.82        | 0.44        |
|                | Change | 0.01 (0.15) [17]           | 0.03 (0.12) [9]          | 0.52 (0.28-0.77) | 0.00    | 0.67        | 0.47        |
| CDCP1          | Start  | 3.75 (0.78) [19]           | 3.56 (0.58) [12]         | 0.56 (0.34-0.78) | 3.53    | 0.50        | 0.68        |
|                | End    | 3.33 (0.61) [19]           | 3.79 (0.57) [12]         | 0.68 (0.48-0.87) | 3.58    | 0.75        | 0.68        |
|                | Change | 0.02 (0.06) [19]           | -0.01 (0.03) [12]        | 0.71 (0.53-0.9)  | 0.02    | 0.92        | 0.53        |
| OPG            | Start  | 10.31 (1.31) [19]          | 9.79 (1.26) [12]         | 0.61 (0.4-0.82)  | 9.77    | 0.58        | 0.68        |
|                | Change | 0.07 (0.1) [19]            | -0.05 (0.09) [12]        | 0.84 (0.7-0.98)  | 0.01    | 0.83        | 0.74        |
| LAP TGF beta 1 | Start  | 4.39 (0.82) [19]           | 4.24 (0.92) [12]         | 0.6 (0.38-0.82)  | 4.36    | 0.75        | 0.58        |
|                | Change | 0.03 (0.07) [19]           | -0.02 (0.06) [12]        | 0.77 (0.59-0.96) | -0.01   | 0.67        | 0.89        |
| uPA            | Start  | 7.91 (0.83) [19]           | 7.86 (0.74) [12]         | 0.52 (0.3-0.73)  | 7.52    | 0.50        | 0.68        |
|                | End    | 8.34 (1.13) [19]           | 9.47 (1.1) [12]          | 0.74 (0.56-0.91) | 8.67    | 0.83        | 0.58        |
|                | Change | -0.04 (0.11) [19]          | -0.08 (0.07) [12]        | 0.74 (0.56-0.93) | -0.04   | 0.92        | 0.63        |

|        |        |                   |                   |                  |       |      |      |
|--------|--------|-------------------|-------------------|------------------|-------|------|------|
| IL6    | Start  | 9.75 (1.72) [19]  | 8.51 (1.99) [12]  | 0.69 (0.48-0.91) | 9.29  | 0.83 | 0.74 |
|        | End    | 8.54 (2.13) [19]  | 8.44 (1.84) [12]  | 0.54 (0.33-0.75) | 7.94  | 0.58 | 0.63 |
|        | Change | 0.06 (0.14) [19]  | 0.01 (0.13) [12]  | 0.68 (0.47-0.89) | 0.07  | 0.75 | 0.68 |
| MCP 1  | Start  | 14.69 (0.51) [19] | 14.79 (0.44) [12] | 0.6 (0.37-0.83)  | 14.88 | 0.67 | 0.63 |
|        | End    | 14.4 (0.91) [19]  | 14.83 (0.32) [12] | 0.61 (0.41-0.81) | 14.47 | 0.92 | 0.42 |
|        | Change | 0.02 (0.05) [19]  | 0 (0.03) [12]     | 0.64 (0.43-0.84) | 0.02  | 0.83 | 0.53 |
| CXCL11 | Start  | 4.64 (0.9) [19]   | 4.74 (1) [12]     | 0.5 (0.28-0.73)  | 4.42  | 0.58 | 0.63 |
|        | End    | 5.58 (1.23) [19]  | 6.17 (0.59) [12]  | 0.68 (0.48-0.87) | 5.77  | 0.75 | 0.68 |
|        | Change | -0.08 (0.13) [19] | -0.07 (0.07) [12] | 0.52 (0.31-0.73) | -0.07 | 0.67 | 0.53 |
| TRAIL  | Start  | 3.15 (1.1) [17]   | 3.26 (0.92) [12]  | 0.57 (0.35-0.79) | 3.21  | 0.58 | 0.65 |
|        | End    | 2.21 (0.32) [11]  | 2.23 (0.4) [12]   | 0.5 (0.25-0.75)  | 1.83  | 1.00 | 0.18 |
|        | Change | 0.04 (0.07) [11]  | 0.05 (0.06) [12]  | 0.52 (0.27-0.76) | 0.03  | 0.58 | 0.55 |
| CXCL9  | Start  | 3.95 (0.85) [19]  | 4.09 (0.82) [12]  | 0.54 (0.32-0.76) | 2.96  | 1.00 | 0.21 |
|        | End    | 5.95 (1.43) [19]  | 7.04 (1.11) [12]  | 0.72 (0.53-0.91) | 6.66  | 0.75 | 0.68 |
|        | Change | -0.15 (0.14) [19] | -0.15 (0.07) [12] | 0.55 (0.34-0.77) | -0.10 | 0.92 | 0.32 |
| CST5   | Start  | 5.28 (0.27) [19]  | 5.32 (0.22) [12]  | 0.51 (0.29-0.73) | 4.91  | 1.00 | 0.16 |
|        | Change | 0 (0.02) [19]     | -0.01 (0.01) [12] | 0.74 (0.54-0.94) | -0.01 | 0.75 | 0.84 |
| OSM    | Start  | 6.35 (1.78) [19]  | 6.36 (1.89) [12]  | 0.54 (0.32-0.77) | 5.43  | 0.50 | 0.79 |
|        | End    | 5.47 (1.46) [19]  | 5.35 (0.98) [12]  | 0.57 (0.36-0.78) | 6.92  | 1.00 | 0.26 |
|        | Change | 0.04 (0.14) [19]  | 0.05 (0.1) [12]   | 0.52 (0.31-0.74) | 0.03  | 0.58 | 0.63 |
| CXCL1  | Start  | 10.07 (1.12) [19] | 8.21 (1.59) [12]  | 0.83 (0.63-1)    | 8.18  | 0.75 | 1.00 |
|        | End    | 10.76 (1.76) [19] | 10.75 (1.34) [12] | 0.52 (0.31-0.73) | 10.94 | 0.58 | 0.63 |
|        | Change | -0.05 (0.08) [19] | -0.13 (0.09) [12] | 0.75 (0.57-0.92) | -0.06 | 0.75 | 0.68 |
| CCL4   | Start  | 7.93 (2.57) [19]  | 8.32 (1.88) [12]  | 0.56 (0.35-0.77) | 8.17  | 0.75 | 0.58 |
|        | End    | 7.35 (1.83) [19]  | 6.42 (0.69) [12]  | 0.64 (0.43-0.84) | 7.10  | 0.92 | 0.53 |

|           |        |                   |                   |                  |       |      |      |
|-----------|--------|-------------------|-------------------|------------------|-------|------|------|
|           | Change | 0.03 (0.19) [19]  | 0.09 (0.09) [12]  | 0.59 (0.38-0.79) | 0.04  | 0.83 | 0.53 |
| SCF       | Start  | 4.54 (0.87) [19]  | 4.83 (0.8) [12]   | 0.63 (0.42-0.83) | 4.26  | 0.83 | 0.58 |
|           | Change | 0.02 (0.06) [19]  | -0.02 (0.06) [12] | 0.73 (0.54-0.92) | 0.02  | 0.92 | 0.53 |
| IL18      | Start  | 4.45 (1.52) [19]  | 4.44 (1.16) [12]  | 0.5 (0.29-0.72)  | 6.44  | 1.00 | 0.16 |
|           | End    | 5 (1.4) [19]      | 5.04 (0.77) [12]  | 0.52 (0.31-0.73) | 5.82  | 0.83 | 0.42 |
|           | Change | -0.06 (0.17) [19] | -0.03 (0.07) [12] | 0.53 (0.31-0.74) | -0.04 | 0.67 | 0.53 |
| TGF alpha | Start  | 5.44 (0.83) [19]  | 5.9 (0.97) [12]   | 0.65 (0.44-0.86) | 5.11  | 0.83 | 0.53 |
|           | End    | 4.65 (0.5) [19]   | 5.25 (0.4) [12]   | 0.83 (0.69-0.97) | 4.61  | 1.00 | 0.53 |
|           | Change | 0.05 (0.06) [19]  | 0.04 (0.06) [12]  | 0.56 (0.34-0.79) | -0.02 | 0.25 | 1.00 |
| MCP 4     | Start  | 9.82 (1.74) [19]  | 10 (1.23) [12]    | 0.55 (0.34-0.76) | 10.28 | 0.50 | 0.74 |
|           | End    | 10.87 (1.93) [19] | 11.61 (1.1) [12]  | 0.67 (0.47-0.86) | 10.98 | 0.83 | 0.58 |
|           | Change | -0.09 (0.15) [19] | -0.08 (0.09) [12] | 0.51 (0.3-0.72)  | 0.02  | 0.92 | 0.26 |
| CCL11     | Start  | 4.29 (1.13) [18]  | 4.65 (0.79) [12]  | 0.62 (0.41-0.82) | 3.73  | 0.92 | 0.39 |
|           | End    | 3.07 (0.51) [19]  | 3.33 (0.25) [12]  | 0.72 (0.53-0.91) | 3.09  | 0.92 | 0.68 |
|           | Change | 0.08 (0.06) [18]  | 0.07 (0.05) [12]  | 0.53 (0.32-0.75) | 0.16  | 1.00 | 0.17 |
| FGF 5     | Start  | 2.69 (0.92) [14]  | 2.32 (0.61) [7]   | 0.67 (0.35-0.99) | 1.95  | 0.57 | 1.00 |
|           | End    | 2.71 (0.65) [14]  | 2.82 (0.53) [12]  | 0.62 (0.38-0.86) | 2.71  | 0.75 | 0.71 |
|           | Change | 0 (0.06) [13]     | -0.03 (0.03) [7]  | 0.6 (0.35-0.86)  | 0.02  | 1.00 | 0.38 |
| MMP 1     | Start  | 11.37 (2.27) [19] | 12.06 (1.81) [12] | 0.59 (0.38-0.8)  | 10.32 | 0.92 | 0.32 |
|           | End    | 10.38 (2.48) [19] | 10.68 (1.72) [12] | 0.54 (0.32-0.75) | 8.43  | 1.00 | 0.21 |
|           | Change | 0.08 (0.18) [19]  | 0.06 (0.11) [12]  | 0.5 (0.29-0.71)  | 0.03  | 0.75 | 0.53 |
| LIF R     | Start  | 3.08 (0.5) [19]   | 3.05 (0.37) [12]  | 0.52 (0.29-0.74) | 3.25  | 0.42 | 0.79 |
|           | End    | 2.78 (0.45) [19]  | 3.07 (0.4) [12]   | 0.67 (0.48-0.87) | 2.60  | 0.92 | 0.42 |
|           | Change | 0.02 (0.03) [19]  | 0 (0.02) [12]     | 0.74 (0.55-0.92) | 0.02  | 0.83 | 0.63 |
|           | Start  | 9.5 (1.26) [19]   | 9.58 (0.98) [12]  | 0.52 (0.31-0.73) | 8.77  | 0.83 | 0.32 |

|         |        |                   |                   |                  |       |      |      |
|---------|--------|-------------------|-------------------|------------------|-------|------|------|
| CCL19   | End    | 11.01 (1.45) [19] | 12.2 (0.36) [12]  | 0.76 (0.59-0.93) | 11.65 | 1.00 | 0.53 |
|         | Change | -0.12 (0.15) [19] | -0.13 (0.07) [12] | 0.61 (0.41-0.82) | -0.08 | 0.92 | 0.53 |
| IL 10RB | Start  | 2.64 (0.52) [16]  | 2.58 (0.51) [10]  | 0.52 (0.28-0.77) | 2.49  | 0.60 | 0.62 |
|         | End    | 2.72 (0.48) [17]  | 3.34 (0.46) [12]  | 0.82 (0.67-0.98) | 3.15  | 0.75 | 0.82 |
|         | Change | -0.01 (0.05) [16] | -0.04 (0.04) [10] | 0.77 (0.57-0.97) | -0.02 | 0.90 | 0.69 |
| IL 18R1 | Start  | 4.75 (1.2) [18]   | 4.5 (1.04) [12]   | 0.57 (0.36-0.79) | 4.39  | 0.67 | 0.56 |
|         | End    | 3.65 (0.71) [16]  | 4.01 (0.5) [12]   | 0.71 (0.5-0.92)  | 3.43  | 1.00 | 0.56 |
|         | Change | 0.06 (0.11) [16]  | 0.02 (0.07) [12]  | 0.71 (0.5-0.92)  | 0.03  | 0.75 | 0.81 |
| PD L1   | Start  | 3.92 (0.66) [15]  | 3.93 (0.5) [6]    | 0.57 (0.25-0.89) | 4.12  | 0.50 | 0.87 |
|         | End    | 3.8 (0.47) [16]   | 4.03 (0.36) [12]  | 0.7 (0.5-0.91)   | 3.82  | 0.75 | 0.75 |
|         | Change | 0 (0.05) [14]     | 0 (0.04) [6]      | 0.52 (0.21-0.84) | 0.00  | 0.67 | 0.57 |
| CXCL5   | Start  | 9.89 (1.57) [19]  | 8.93 (2.17) [12]  | 0.69 (0.47-0.91) | 9.47  | 0.75 | 0.74 |
|         | End    | 9.67 (2.27) [19]  | 9.03 (1.47) [12]  | 0.6 (0.4-0.8)    | 11.67 | 1.00 | 0.26 |
|         | Change | 0.03 (0.16) [19]  | 0 (0.12) [12]     | 0.59 (0.38-0.8)  | 0.10  | 0.83 | 0.37 |
| TRANCE  | Start  | 1.69 (0.63) [8]   | 1.5 (0.46) [6]    | 0.6 (0.28-0.93)  | 1.43  | 0.67 | 0.62 |
| HGF     | Start  | 8.02 (0.62) [19]  | 7.98 (0.86) [12]  | 0.57 (0.34-0.81) | 7.81  | 0.67 | 0.74 |
|         | End    | 7.81 (0.88) [19]  | 8.78 (0.74) [12]  | 0.78 (0.61-0.95) | 8.82  | 0.50 | 0.95 |
|         | Change | 0.01 (0.06) [19]  | -0.04 (0.06) [12] | 0.73 (0.55-0.91) | -0.02 | 0.75 | 0.68 |
| IL 12B  | Start  | 2.01 (0.88) [19]  | 2.2 (0.86) [12]   | 0.56 (0.35-0.78) | 1.76  | 0.67 | 0.53 |
|         | End    | 2.86 (1.25) [19]  | 3.15 (0.81) [12]  | 0.59 (0.39-0.8)  | 2.17  | 1.00 | 0.32 |
|         | Change | -0.05 (0.1) [19]  | -0.05 (0.06) [12] | 0.52 (0.31-0.73) | -0.13 | 1.00 | 0.26 |
| MMP 10  | Start  | 7.08 (1.49) [19]  | 6.41 (1.97) [12]  | 0.66 (0.44-0.89) | 5.54  | 0.50 | 0.89 |
|         | End    | 5.8 (1.31) [19]   | 6.74 (0.86) [12]  | 0.73 (0.55-0.91) | 5.71  | 1.00 | 0.47 |
|         | Change | 0.11 (0.16) [19]  | -0.01 (0.1) [12]  | 0.8 (0.63-0.98)  | 0.01  | 0.75 | 0.84 |
| IL10    | Start  | 4.32 (1.19) [17]  | 3.87 (1.07) [11]  | 0.63 (0.39-0.86) | 3.24  | 0.55 | 0.88 |

|         |        |                   |                   |                  |       |      |      |
|---------|--------|-------------------|-------------------|------------------|-------|------|------|
|         | End    | 3.16 (0.32) [8]   | 3.14 (0.49) [7]   | 0.55 (0.22-0.88) | 2.88  | 0.43 | 0.88 |
| TNF     | Start  | 1.91 (1.05) [18]  | 1.54 (0.68) [11]  | 0.58 (0.36-0.79) | 3.09  | 1.00 | 0.22 |
|         | End    | 3.02 (1.99) [19]  | 1.84 (0.34) [12]  | 0.6 (0.4-0.81)   | 2.36  | 1.00 | 0.42 |
|         | Change | -0.08 (0.14) [18] | -0.02 (0.04) [11] | 0.65 (0.44-0.85) | -0.03 | 0.73 | 0.61 |
| CCL23   | Start  | 6.41 (0.81) [19]  | 5.93 (0.92) [12]  | 0.66 (0.45-0.87) | 6.02  | 0.58 | 0.74 |
|         | End    | 7.28 (1.46) [19]  | 8.14 (1.09) [12]  | 0.68 (0.49-0.87) | 7.01  | 0.92 | 0.47 |
|         | Change | -0.07 (0.09) [19] | -0.11 (0.09) [12] | 0.68 (0.48-0.87) | -0.05 | 0.92 | 0.53 |
| CD5     | Start  | 3.56 (1.43) [19]  | 2.76 (1.29) [12]  | 0.71 (0.51-0.9)  | 2.74  | 0.75 | 0.68 |
|         | End    | 3.26 (1.13) [19]  | 3.07 (0.62) [12]  | 0.54 (0.33-0.75) | 3.44  | 0.92 | 0.37 |
|         | Change | 0 (0.13) [19]     | -0.01 (0.09) [12] | 0.68 (0.47-0.89) | -0.01 | 0.75 | 0.79 |
| CCL3    | Start  | 7.7 (2.47) [19]   | 7.47 (1.78) [12]  | 0.5 (0.29-0.71)  | 7.01  | 0.67 | 0.53 |
|         | End    | 8.94 (2.76) [19]  | 6.92 (0.67) [12]  | 0.68 (0.49-0.88) | 7.61  | 0.92 | 0.58 |
|         | Change | -0.09 (0.19) [19] | 0.02 (0.09) [12]  | 0.74 (0.56-0.91) | -0.03 | 0.83 | 0.68 |
| Flt3L   | Start  | 8.15 (0.57) [19]  | 8.09 (0.61) [12]  | 0.56 (0.34-0.79) | 7.77  | 0.50 | 0.79 |
|         | Change | 0.01 (0.05) [19]  | -0.03 (0.04) [12] | 0.79 (0.61-0.96) | -0.03 | 0.67 | 0.89 |
| CXCL6   | Start  | 7.32 (0.83) [19]  | 6.05 (1) [12]     | 0.82 (0.67-0.97) | 5.73  | 0.50 | 1.00 |
|         | End    | 8.51 (1.6) [19]   | 9.98 (1.25) [12]  | 0.79 (0.62-0.96) | 9.13  | 0.92 | 0.68 |
|         | Change | -0.1 (0.14) [19]  | -0.2 (0.11) [12]  | 0.76 (0.59-0.93) | -0.05 | 1.00 | 0.47 |
| CXCL10  | Start  | 10.48 (1.1) [19]  | 9.8 (1.77) [12]   | 0.65 (0.42-0.89) | 9.31  | 0.58 | 0.89 |
|         | End    | 12.46 (1.34) [19] | 13.19 (0.57) [12] | 0.71 (0.52-0.89) | 12.48 | 0.92 | 0.58 |
|         | Change | -0.16 (0.2) [19]  | -0.17 (0.1) [12]  | 0.64 (0.43-0.86) | -0.15 | 0.67 | 0.79 |
| X4E BP1 | Start  | 6.22 (2.24) [19]  | 4.53 (1.63) [12]  | 0.75 (0.56-0.93) | 4.14  | 0.50 | 0.95 |
|         | End    | 7.48 (1.61) [19]  | 7.84 (0.9) [12]   | 0.56 (0.35-0.76) | 6.13  | 1.00 | 0.26 |
|         | Change | -0.12 (0.22) [19] | -0.16 (0.08) [12] | 0.64 (0.45-0.84) | -0.11 | 0.83 | 0.58 |
|         | Start  | 9.5 (0.6) [19]    | 9.53 (0.42) [12]  | 0.53 (0.31-0.74) | 9.81  | 0.83 | 0.37 |

|           |        |                   |                   |                  |       |      |      |
|-----------|--------|-------------------|-------------------|------------------|-------|------|------|
| DNER      | End    | 9.6 (0.58) [19]   | 10.13 (0.16) [12] | 0.82 (0.67-0.97) | 9.88  | 1.00 | 0.68 |
|           | Change | -0.01 (0.04) [19] | -0.03 (0.02) [12] | 0.73 (0.55-0.91) | -0.01 | 0.92 | 0.58 |
| EN RAGE   | Start  | 4.54 (2.35) [18]  | 3.5 (1.66) [11]   | 0.66 (0.44-0.88) | 2.67  | 0.45 | 0.89 |
|           | End    | 4.48 (1.77) [19]  | 4.88 (1.79) [12]  | 0.54 (0.33-0.75) | 5.58  | 0.50 | 0.68 |
|           | Change | -0.02 (0.18) [18] | -0.08 (0.1) [11]  | 0.68 (0.48-0.88) | 0.03  | 1.00 | 0.50 |
| CD40      | Start  | 9.78 (1.06) [19]  | 9.51 (0.96) [12]  | 0.58 (0.36-0.79) | 9.78  | 0.75 | 0.53 |
|           | End    | 9.95 (0.67) [19]  | 10.39 (0.63) [12] | 0.66 (0.47-0.86) | 10.22 | 0.67 | 0.68 |
|           | Change | -0.03 (0.1) [19]  | -0.04 (0.06) [12] | 0.64 (0.43-0.85) | -0.08 | 0.33 | 0.95 |
| IFN gamma | Start  | 5.56 (0.84) [8]   | 5.91 (0.88) [5]   | 0.68 (0.35-1)    | 5.45  | 0.80 | 0.62 |
|           | End    | 6.36 (1.18) [15]  | 5.94 (0.71) [11]  | 0.6 (0.38-0.82)  | 6.81  | 0.91 | 0.40 |
| FGF 19    | Start  | 5.57 (0.82) [19]  | 5.7 (0.74) [12]   | 0.59 (0.38-0.8)  | 5.15  | 0.92 | 0.42 |
|           | Change | 0.08 (0.06) [19]  | 0.02 (0.06) [12]  | 0.74 (0.55-0.92) | 0.03  | 0.75 | 0.74 |
| LIF       | Start  | 7.86 (2.04) [19]  | 7.4 (2.54) [12]   | 0.59 (0.37-0.81) | 8.72  | 0.83 | 0.42 |
|           | End    | 4.08 (1.4) [19]   | 5.07 (1.31) [12]  | 0.7 (0.5-0.89)   | 4.67  | 0.67 | 0.74 |
|           | Change | 0.26 (0.13) [19]  | 0.12 (0.15) [12]  | 0.78 (0.59-0.97) | 0.22  | 0.83 | 0.68 |
| MCP 2     | Start  | 7.95 (1.5) [19]   | 7.78 (1.11) [12]  | 0.5 (0.29-0.72)  | 9.93  | 1.00 | 0.21 |
|           | End    | 8.56 (1.2) [19]   | 8.97 (0.72) [12]  | 0.61 (0.4-0.81)  | 8.25  | 0.92 | 0.42 |
|           | Change | -0.07 (0.21) [19] | -0.06 (0.07) [12] | 0.56 (0.35-0.77) | 0.02  | 1.00 | 0.32 |
| CASP 8    | End    | 3.85 (0.97) [13]  | 3.11 (0.49) [7]   | 0.76 (0.54-0.98) | 3.87  | 1.00 | 0.54 |
| CCL25     | Start  | 2.92 (0.48) [6]   | 2.71 (0.46) [5]   | 0.63 (0.25-1)    | 2.84  | 0.80 | 0.67 |
| CX3CL1    | End    | 2.28 (0.19) [5]   | 2.41 (0.24) [8]   | 0.7 (0.39-1)     | 2.49  | 0.50 | 1.00 |
| TNFRSF9   | Start  | 3.96 (0.64) [17]  | 3.56 (0.41) [6]   | 0.68 (0.45-0.91) | 4.11  | 1.00 | 0.41 |
|           | End    | 4.19 (0.59) [19]  | 4.59 (0.51) [12]  | 0.69 (0.5-0.89)  | 3.92  | 1.00 | 0.47 |
|           | Change | -0.01 (0.04) [17] | -0.04 (0.04) [6]  | 0.69 (0.4-0.98)  | -0.04 | 0.67 | 0.82 |
|           | Start  | 8.11 (0.74) [19]  | 8.16 (0.69) [12]  | 0.54 (0.32-0.76) | 8.04  | 0.67 | 0.58 |

|        |        |                   |                   |                  |      |      |      |
|--------|--------|-------------------|-------------------|------------------|------|------|------|
| TWEAK  | End    | 8.27 (0.7) [19]   | 8.75 (0.52) [12]  | 0.71 (0.53-0.9)  | 8.30 | 0.92 | 0.53 |
|        | Change | -0.02 (0.05) [19] | -0.03 (0.04) [12] | 0.62 (0.41-0.83) | 0.00 | 0.83 | 0.47 |
| CCL20  | Start  | 9.01 (2.05) [19]  | 8.51 (2.07) [12]  | 0.61 (0.39-0.83) | 9.01 | 0.83 | 0.58 |
|        | End    | 7.68 (1.93) [18]  | 6.85 (0.94) [12]  | 0.61 (0.4-0.82)  | 7.66 | 0.92 | 0.44 |
|        | Change | 0.11 (0.17) [18]  | 0.09 (0.11) [12]  | 0.6 (0.38-0.82)  | 0.11 | 0.83 | 0.56 |
| STAMBP | Start  | 4.06 (1.95) [19]  | 3.06 (1.04) [12]  | 0.65 (0.45-0.85) | 3.26 | 0.83 | 0.53 |
|        | End    | 2.8 (0.72) [15]   | 2.9 (0.58) [12]   | 0.54 (0.31-0.77) | 3.05 | 0.50 | 0.73 |
|        | Change | 0.09 (0.1) [15]   | 0.01 (0.05) [12]  | 0.77 (0.58-0.95) | 0.03 | 0.75 | 0.80 |
| ADA    | Start  | 5.53 (1.45) [19]  | 4.87 (0.92) [12]  | 0.65 (0.44-0.86) | 4.10 | 0.33 | 1.00 |
|        | End    | 5.32 (1.04) [19]  | 5.84 (0.87) [12]  | 0.63 (0.42-0.83) | 5.74 | 0.58 | 0.74 |
|        | Change | 0 (0.08) [19]     | -0.05 (0.04) [12] | 0.71 (0.53-0.9)  | 0.00 | 0.92 | 0.47 |
| TNFB   | End    | 2.89 (0.64) [17]  | 2.96 (0.4) [11]   | 0.59 (0.38-0.81) | 2.75 | 0.73 | 0.59 |
| CSF 1  | Start  | 9.18 (0.61) [19]  | 8.71 (0.5) [12]   | 0.72 (0.53-0.9)  | 9.14 | 0.92 | 0.53 |
|        | End    | 8.39 (0.62) [19]  | 9.06 (0.35) [12]  | 0.84 (0.69-0.98) | 8.45 | 1.00 | 0.68 |
