# Supplementary material for: Inflammatory Markers as Predictors of Shunt Dependency and Functional Outcome in Patients with Aneurysmal Subarachnoid Hemorrhage
Source: MDPI journal article supplement (doi:10.3390/biomedicines11040997), 2023-03-23
Supplement: s1 [file s1]

**Supplemental file S2, Table S2**

**Predictors of functional outcome (not reaching lower confidence limit of  $\geq 0.7$ )**

| Name           | Time   | mRS 0-2 - mean (SD) [n] | mRS 3-6 - mean (SD) [n] | AUC (95%CI)      | Cut-off | Sensitivity | Specificity |
|----------------|--------|-------------------------|-------------------------|------------------|---------|-------------|-------------|
| IL8            | Start  | 11.46 (1.66) [12]       | 11.47 (1.85) [12]       | 0.51 (0.26-0.75) | 13.54   | 1.00        | 0.17        |
| IL8            | End    | 11.33 (1.32) [12]       | 12.94 (0.89) [12]       | 0.8 (0.6-0.99)   | 11.32   | 1.00        | 0.58        |
| VEGFA          | Start  | 9.86 (0.85) [12]        | 9.98 (1.07) [12]        | 0.51 (0.27-0.76) | 9.88    | 0.50        | 0.75        |
| VEGFA          | End    | 9.76 (0.73) [12]        | 9.86 (1.17) [12]        | 0.51 (0.25-0.76) | 10.07   | 0.58        | 0.75        |
| VEGFA          | Change | 0.01 (0.05) [12]        | 0.01 (0.09) [12]        | 0.55 (0.3-0.79)  | 0.01    | 0.58        | 0.67        |
| CD8A           | Start  | 5.31 (1.16) [12]        | 5.05 (1.24) [12]        | 0.57 (0.32-0.82) | 4.84    | 0.58        | 0.75        |
| CD8A           | End    | 5.51 (0.51) [12]        | 5.12 (1.4) [12]         | 0.55 (0.29-0.81) | 4.63    | 0.42        | 1.00        |
| CD8A           | Change | -0.01 (0.06) [12]       | 0 (0.1) [12]            | 0.51 (0.25-0.78) | 0.01    | 0.50        | 0.83        |
| MCP 3          | Start  | 4.74 (1.78) [11]        | 6.3 (1.87) [9]          | 0.76 (0.54-0.98) | 4.22    | 1.00        | 0.55        |
| MCP 3          | End    | 4.54 (1.8) [10]         | 6.06 (1.65) [12]        | 0.78 (0.57-0.99) | 4.31    | 1.00        | 0.60        |
| MCP 3          | Change | -0.02 (0.18) [10]       | 0.02 (0.09) [9]         | 0.53 (0.25-0.81) | -0.03   | 0.89        | 0.40        |
| CDCP1          | Start  | 3.39 (0.41) [12]        | 3.76 (0.59) [12]        | 0.72 (0.49-0.94) | 3.66    | 0.67        | 0.83        |
| CDCP1          | End    | 3.39 (0.49) [12]        | 3.78 (0.77) [12]        | 0.71 (0.49-0.93) | 3.81    | 0.58        | 0.83        |
| CDCP1          | Change | -0.01 (0.04) [12]       | 0 (0.06) [12]           | 0.52 (0.27-0.77) | 0.00    | 0.58        | 0.58        |
| CD244          | Start  | 3.56 (0.33) [5]         | 3.91 (0.88) [6]         | 0.6 (0.2-1)      | 4.13    | 0.50        | 1.00        |
| OPG            | Start  | 10.26 (1.06) [12]       | 9.36 (1.21) [12]        | 0.71 (0.49-0.93) | 8.84    | 0.50        | 1.00        |
| OPG            | End    | 10.12 (0.93) [12]       | 9.89 (1.44) [12]        | 0.53 (0.29-0.78) | 10.48   | 0.75        | 0.42        |
| OPG            | Change | 0.03 (0.1) [12]         | -0.02 (0.1) [12]        | 0.59 (0.35-0.83) | -0.05   | 0.33        | 0.92        |
| LAP TGF beta 1 | Start  | 4.54 (0.73) [12]        | 4.11 (0.97) [12]        | 0.67 (0.44-0.91) | 4.01    | 0.58        | 0.83        |
| LAP TGF beta 1 | End    | 4.47 (0.57) [12]        | 4.1 (0.86) [12]         | 0.68 (0.46-0.91) | 4.63    | 0.83        | 0.50        |
| LAP TGF beta 1 | Change | 0 (0.06) [12]           | 0 (0.08) [12]           | 0.52 (0.25-0.79) | 0.06    | 0.42        | 1.00        |
| uPA            | Start  | 7.61 (0.78) [12]        | 8.02 (0.75) [12]        | 0.66 (0.43-0.89) | 7.03    | 1.00        | 0.33        |
| uPA            | End    | 8.75 (1.1) [12]         | 9.17 (1.36) [12]        | 0.6 (0.36-0.85)  | 8.87    | 0.75        | 0.58        |

|        |        |                   |                   |                  |       |      |      |
|--------|--------|-------------------|-------------------|------------------|-------|------|------|
| uPA    | Change | -0.09 (0.12) [12] | -0.06 (0.09) [12] | 0.55 (0.31-0.79) | -0.06 | 0.58 | 0.58 |
| IL6    | Start  | 9.06 (2.08) [12]  | 8.82 (2.04) [12]  | 0.54 (0.29-0.79) | 8.99  | 0.67 | 0.58 |
| IL6    | End    | 7.78 (2.33) [12]  | 9.08 (1.88) [12]  | 0.67 (0.44-0.89) | 6.32  | 1.00 | 0.33 |
| IL6    | Change | 0.05 (0.15) [12]  | -0.01 (0.15) [12] | 0.69 (0.46-0.92) | 0.05  | 0.75 | 0.67 |
| MCP 1  | Start  | 14.71 (0.64) [12] | 14.68 (0.43) [12] | 0.58 (0.34-0.83) | 15.18 | 1.00 | 0.25 |
| MCP 1  | End    | 14.39 (0.93) [12] | 14.65 (0.78) [12] | 0.61 (0.37-0.85) | 14.26 | 0.92 | 0.33 |
| MCP 1  | Change | 0.02 (0.03) [12]  | 0.01 (0.07) [12]  | 0.65 (0.41-0.88) | 0.00  | 0.58 | 0.83 |
| CXCL11 | Start  | 4.68 (0.88) [12]  | 4.88 (1.13) [12]  | 0.53 (0.29-0.78) | 5.53  | 0.33 | 0.83 |
| CXCL11 | End    | 6.17 (0.8) [12]   | 5.76 (1.32) [12]  | 0.6 (0.37-0.84)  | 6.69  | 0.83 | 0.42 |
| CXCL11 | Change | -0.11 (0.12) [12] | -0.05 (0.13) [12] | 0.62 (0.38-0.87) | -0.01 | 0.50 | 0.92 |
| TRAIL  | Start  | 3.41 (0.96) [10]  | 3.41 (1.17) [12]  | 0.5 (0.24-0.76)  | 2.15  | 1.00 | 0.20 |
| TRAIL  | End    | 2.13 (0.31) [10]  | 2.41 (0.4) [8]    | 0.79 (0.56-1)    | 2.14  | 0.88 | 0.70 |
| TRAIL  | Change | 0.06 (0.07) [10]  | 0.04 (0.06) [8]   | 0.65 (0.37-0.93) | 0.06  | 0.75 | 0.70 |
| CXCL9  | Start  | 4.08 (0.81) [12]  | 4.15 (0.92) [12]  | 0.53 (0.28-0.77) | 3.75  | 0.75 | 0.42 |
| CXCL9  | End    | 6.61 (1.4) [12]   | 6.41 (1.5) [12]   | 0.55 (0.3-0.79)  | 7.91  | 1.00 | 0.25 |
| CXCL9  | Change | -0.17 (0.15) [12] | -0.13 (0.1) [12]  | 0.56 (0.32-0.81) | -0.10 | 0.42 | 0.83 |
| CST5   | Start  | 5.35 (0.2) [12]   | 5.22 (0.27) [12]  | 0.65 (0.41-0.88) | 5.40  | 0.83 | 0.50 |
| CST5   | End    | 5.4 (0.1) [12]    | 5.38 (0.3) [12]   | 0.61 (0.36-0.87) | 5.50  | 0.58 | 0.83 |
| CST5   | Change | 0 (0.01) [12]     | -0.01 (0.02) [12] | 0.59 (0.35-0.83) | -0.01 | 0.50 | 0.83 |
| OSM    | Start  | 5.79 (1.84) [12]  | 6.71 (2.07) [12]  | 0.6 (0.37-0.84)  | 4.96  | 0.83 | 0.42 |
| OSM    | End    | 4.85 (1.5) [12]   | 5.89 (0.8) [12]   | 0.75 (0.53-0.97) | 4.59  | 1.00 | 0.58 |
| OSM    | Change | 0.03 (0.15) [12]  | 0.05 (0.12) [12]  | 0.51 (0.26-0.75) | -0.02 | 0.42 | 0.75 |
| CXCL1  | Start  | 9.34 (1.77) [12]  | 8.9 (1.66) [12]   | 0.58 (0.33-0.82) | 10.96 | 1.00 | 0.25 |
| CXCL1  | End    | 10.06 (1.74) [12] | 11.32 (1.45) [12] | 0.69 (0.47-0.91) | 9.74  | 0.92 | 0.50 |
| CXCL1  | Change | -0.05 (0.08) [12] | -0.13 (0.1) [12]  | 0.75 (0.54-0.96) | -0.08 | 0.75 | 0.83 |
| CCL4   | Start  | 7.71 (2.89) [12]  | 8.88 (2.11) [12]  | 0.65 (0.42-0.89) | 7.68  | 0.83 | 0.50 |

|           |        |                   |                   |                  |       |      |      |
|-----------|--------|-------------------|-------------------|------------------|-------|------|------|
| CCL4      | End    | 6.32 (0.87) [12]  | 7.53 (1.75) [12]  | 0.74 (0.53-0.94) | 7.10  | 0.58 | 0.92 |
| CCL4      | Change | 0.06 (0.18) [12]  | 0.07 (0.15) [12]  | 0.55 (0.3-0.8)   | 0.05  | 0.75 | 0.50 |
| SCF       | Start  | 4.64 (0.81) [12]  | 4.81 (0.99) [12]  | 0.53 (0.28-0.79) | 3.90  | 1.00 | 0.25 |
| SCF       | End    | 4.65 (0.71) [12]  | 4.82 (1) [12]     | 0.51 (0.26-0.77) | 5.69  | 0.33 | 1.00 |
| SCF       | Change | 0 (0.05) [12]     | 0 (0.08) [12]     | 0.51 (0.26-0.77) | -0.01 | 0.58 | 0.67 |
| IL18      | Start  | 4.2 (1.49) [12]   | 4.82 (1.57) [12]  | 0.6 (0.37-0.84)  | 3.47  | 0.83 | 0.42 |
| IL18      | End    | 4.65 (1.31) [12]  | 5.53 (0.82) [12]  | 0.71 (0.48-0.94) | 4.42  | 1.00 | 0.42 |
| IL18      | Change | -0.07 (0.2) [12]  | -0.04 (0.1) [12]  | 0.57 (0.31-0.83) | -0.10 | 0.50 | 0.92 |
| TGF alpha | Start  | 5.54 (1.06) [12]  | 5.79 (0.92) [12]  | 0.6 (0.36-0.85)  | 5.31  | 0.75 | 0.58 |
| TGF alpha | End    | 4.89 (0.51) [12]  | 4.92 (0.67) [12]  | 0.54 (0.3-0.79)  | 4.77  | 0.67 | 0.58 |
| TGF alpha | Change | 0.04 (0.07) [12]  | 0.05 (0.07) [12]  | 0.55 (0.3-0.8)   | 0.04  | 0.50 | 0.83 |
| MCP 4     | Start  | 9.78 (1.78) [12]  | 10.43 (1.51) [12] | 0.58 (0.34-0.83) | 8.93  | 0.92 | 0.42 |
| MCP 4     | End    | 10.94 (1.48) [12] | 11.48 (1.64) [12] | 0.62 (0.38-0.85) | 11.17 | 0.75 | 0.58 |
| MCP 4     | Change | -0.09 (0.14) [12] | -0.06 (0.13) [12] | 0.53 (0.28-0.79) | 0.00  | 0.42 | 0.83 |
| CCL11     | Start  | 4.52 (1.1) [11]   | 4.73 (0.96) [12]  | 0.55 (0.29-0.81) | 3.84  | 0.92 | 0.36 |
| CCL11     | End    | 3.19 (0.45) [12]  | 3.25 (0.4) [12]   | 0.56 (0.31-0.8)  | 3.19  | 0.67 | 0.58 |
| CCL11     | Change | 0.07 (0.05) [11]  | 0.09 (0.06) [12]  | 0.54 (0.29-0.79) | 0.02  | 0.92 | 0.27 |
| FGF 5     | Start  | 2.42 (0.52) [10]  | 2.12 (0.24) [5]   | 0.64 (0.35-0.93) | 2.57  | 1.00 | 0.40 |
| FGF 5     | End    | 2.76 (0.57) [11]  | 2.76 (0.57) [10]  | 0.51 (0.24-0.78) | 2.99  | 0.40 | 0.82 |
| FGF 5     | Change | -0.03 (0.04) [10] | -0.04 (0.03) [5]  | 0.58 (0.26-0.9)  | -0.01 | 0.80 | 0.50 |
| MMP 1     | Start  | 11.53 (2.41) [12] | 12.17 (2.26) [12] | 0.51 (0.26-0.76) | 13.34 | 0.33 | 0.92 |
| MMP 1     | End    | 9.51 (1.73) [12]  | 11.96 (1.82) [12] | 0.83 (0.67-1)    | 10.06 | 1.00 | 0.67 |
| MMP 1     | Change | 0.11 (0.09) [12]  | 0.01 (0.17) [12]  | 0.69 (0.46-0.92) | 0.12  | 0.83 | 0.58 |
| LIF R     | Start  | 3.08 (0.25) [12]  | 2.9 (0.36) [12]   | 0.67 (0.44-0.91) | 2.88  | 0.58 | 0.83 |
| LIF R     | End    | 2.9 (0.48) [12]   | 2.93 (0.4) [12]   | 0.58 (0.33-0.83) | 2.78  | 0.83 | 0.58 |
| LIF R     | Change | 0.01 (0.03) [12]  | 0 (0.02) [12]     | 0.62 (0.39-0.86) | 0.00  | 0.75 | 0.58 |

|         |        |                   |                   |                  |       |      |      |
|---------|--------|-------------------|-------------------|------------------|-------|------|------|
| CCL19   | Start  | 9.65 (0.8) [12]   | 8.96 (1.14) [12]  | 0.72 (0.5-0.94)  | 8.70  | 0.50 | 1.00 |
| CCL19   | End    | 11.84 (1) [12]    | 11.12 (1.67) [12] | 0.58 (0.34-0.83) | 11.21 | 0.42 | 0.92 |
| CCL19   | Change | -0.15 (0.16) [12] | -0.12 (0.1) [12]  | 0.54 (0.29-0.79) | -0.08 | 0.42 | 0.83 |
| IL 10RB | Start  | 2.56 (0.49) [11]  | 2.66 (0.56) [9]   | 0.54 (0.26-0.81) | 2.70  | 0.44 | 0.73 |
| IL 10RB | End    | 2.9 (0.49) [12]   | 3.16 (0.62) [11]  | 0.64 (0.39-0.88) | 3.05  | 0.73 | 0.67 |
| IL 10RB | Change | -0.03 (0.06) [11] | -0.02 (0.05) [9]  | 0.52 (0.23-0.8)  | -0.05 | 0.33 | 0.91 |
| IL 18R1 | Start  | 4.61 (0.89) [11]  | 4.56 (1.31) [12]  | 0.59 (0.33-0.85) | 3.68  | 0.42 | 1.00 |
| IL 18R1 | End    | 3.74 (0.6) [11]   | 3.99 (0.71) [10]  | 0.63 (0.36-0.9)  | 3.96  | 0.60 | 0.82 |
| IL 18R1 | Change | 0.03 (0.1) [11]   | 0.04 (0.09) [10]  | 0.55 (0.26-0.83) | -0.02 | 0.40 | 0.91 |
| PD L1   | Start  | 3.75 (0.32) [9]   | 3.82 (0.5) [6]    | 0.52 (0.17-0.87) | 3.92  | 0.50 | 0.78 |
| PD L1   | End    | 3.78 (0.43) [12]  | 4 (0.42) [11]     | 0.64 (0.41-0.88) | 3.52  | 0.91 | 0.42 |
| PD L1   | Change | -0.01 (0.04) [9]  | -0.01 (0.05) [6]  | 0.5 (0.12-0.88)  | 0.03  | 0.50 | 0.89 |
| CXCL5   | Start  | 9.3 (1.85) [12]   | 9.1 (2.12) [12]   | 0.53 (0.28-0.78) | 7.49  | 0.33 | 0.92 |
| CXCL5   | Change | 0.08 (0.09) [12]  | -0.08 (0.16) [12] | 0.81 (0.64-0.99) | -0.03 | 0.58 | 1.00 |
| TRANCE  | Start  | 1.47 (0.4) [7]    | 1.97 (0.69) [5]   | 0.74 (0.4-1)     | 1.60  | 0.80 | 0.71 |
| HGF     | Start  | 7.99 (0.56) [12]  | 7.96 (0.86) [12]  | 0.54 (0.28-0.8)  | 7.42  | 0.42 | 1.00 |
| HGF     | End    | 8.17 (0.66) [12]  | 8.4 (1.2) [12]    | 0.61 (0.37-0.85) | 8.36  | 0.58 | 0.67 |
| HGF     | Change | -0.02 (0.05) [12] | -0.02 (0.08) [12] | 0.62 (0.36-0.87) | -0.03 | 0.67 | 0.83 |
| IL 12B  | Start  | 2.16 (0.94) [12]  | 2.28 (0.96) [12]  | 0.51 (0.27-0.76) | 1.23  | 1.00 | 0.17 |
| IL 12B  | End    | 3.3 (1.1) [12]    | 2.89 (1.14) [12]  | 0.64 (0.41-0.87) | 2.49  | 0.50 | 0.83 |
| IL 12B  | Change | -0.05 (0.1) [12]  | -0.03 (0.1) [12]  | 0.58 (0.34-0.82) | -0.03 | 0.50 | 0.75 |
| MMP 10  | Start  | 6.63 (1.63) [12]  | 6.47 (1.95) [12]  | 0.52 (0.27-0.77) | 5.42  | 0.33 | 0.83 |
| MMP 10  | End    | 5.83 (0.99) [12]  | 6.83 (1.41) [12]  | 0.74 (0.51-0.96) | 6.91  | 0.67 | 0.92 |
| MMP 10  | Change | 0.08 (0.16) [12]  | -0.01 (0.15) [12] | 0.63 (0.4-0.87)  | -0.04 | 0.42 | 0.92 |
| IL10    | Start  | 4.52 (1.26) [10]  | 4.17 (1.26) [11]  | 0.58 (0.32-0.84) | 3.96  | 0.55 | 0.70 |
| IL10    | End    | 3.17 (0.28) [5]   | 3.17 (0.51) [8]   | 0.5 (0.16-0.84)  | 3.48  | 0.38 | 1.00 |

|         |        |                   |                   |                  |       |      |      |
|---------|--------|-------------------|-------------------|------------------|-------|------|------|
| IL10    | Change | 0.12 (0.09) [5]   | 0.02 (0.07) [7]   | 0.77 (0.48-1)    | 0.04  | 0.71 | 0.80 |
| TNF     | Start  | 1.76 (0.98) [11]  | 1.72 (1.05) [12]  | 0.52 (0.26-0.77) | 1.87  | 0.75 | 0.45 |
| TNF     | Change | -0.02 (0.1) [11]  | -0.09 (0.14) [12] | 0.64 (0.41-0.88) | -0.05 | 0.58 | 0.73 |
| CCL23   | Start  | 6.2 (0.63) [12]   | 5.88 (0.97) [12]  | 0.65 (0.42-0.89) | 5.53  | 0.50 | 0.92 |
| CCL23   | End    | 7.32 (1.35) [12]  | 7.82 (1.54) [12]  | 0.59 (0.35-0.83) | 7.48  | 0.67 | 0.67 |
| CCL23   | Change | -0.07 (0.1) [12]  | -0.11 (0.1) [12]  | 0.58 (0.34-0.82) | -0.06 | 0.67 | 0.58 |
| CD5     | Start  | 3.03 (0.99) [12]  | 3.19 (1.79) [12]  | 0.53 (0.29-0.78) | 2.04  | 0.33 | 0.92 |
| CD5     | End    | 3.27 (0.84) [12]  | 2.81 (0.94) [12]  | 0.69 (0.47-0.92) | 2.22  | 0.42 | 1.00 |
| CD5     | Change | -0.04 (0.12) [12] | 0.03 (0.11) [12]  | 0.58 (0.33-0.83) | 0.03  | 0.50 | 0.83 |
| CCL3    | Start  | 7.2 (2.6) [12]    | 8.23 (2.27) [12]  | 0.64 (0.4-0.88)  | 6.80  | 0.83 | 0.58 |
| CCL3    | End    | 7.04 (1.24) [12]  | 9.13 (2.66) [12]  | 0.79 (0.6-0.98)  | 7.05  | 0.92 | 0.58 |
| CCL3    | Change | -0.01 (0.18) [12] | -0.06 (0.15) [12] | 0.53 (0.29-0.78) | 0.11  | 1.00 | 0.25 |
| Flt3L   | Start  | 8.09 (0.45) [12]  | 8.1 (0.67) [12]   | 0.55 (0.3-0.8)   | 7.90  | 0.58 | 0.75 |
| Flt3L   | End    | 8.31 (0.57) [12]  | 8.35 (0.92) [12]  | 0.6 (0.37-0.84)  | 8.04  | 0.83 | 0.42 |
| Flt3L   | Change | -0.02 (0.05) [12] | -0.01 (0.06) [12] | 0.56 (0.31-0.81) | -0.04 | 0.50 | 0.83 |
| CXCL6   | Start  | 7.18 (0.96) [12]  | 6.07 (1.02) [12]  | 0.78 (0.59-0.98) | 7.07  | 0.83 | 0.67 |
| CXCL6   | End    | 9.28 (1.85) [12]  | 9.27 (1.77) [12]  | 0.53 (0.28-0.77) | 10.02 | 0.75 | 0.50 |
| CXCL6   | Change | -0.14 (0.15) [12] | -0.17 (0.14) [12] | 0.53 (0.29-0.78) | -0.11 | 0.83 | 0.42 |
| CXCL10  | Start  | 10.29 (1.32) [12] | 9.6 (1.54) [12]   | 0.67 (0.45-0.9)  | 10.29 | 0.83 | 0.58 |
| CXCL10  | End    | 12.98 (0.97) [12] | 12.69 (1.54) [12] | 0.52 (0.28-0.77) | 12.32 | 0.33 | 0.92 |
| CXCL10  | Change | -0.2 (0.24) [12]  | -0.17 (0.11) [12] | 0.54 (0.29-0.79) | -0.10 | 0.83 | 0.42 |
| X4E BP1 | Start  | 5.04 (2.35) [12]  | 5.64 (2.31) [12]  | 0.62 (0.39-0.86) | 4.16  | 0.83 | 0.50 |
| X4E BP1 | End    | 7.29 (1.54) [12]  | 8.08 (0.7) [12]   | 0.67 (0.44-0.91) | 7.36  | 0.92 | 0.58 |
| X4E BP1 | Change | -0.17 (0.24) [12] | -0.14 (0.13) [12] | 0.57 (0.33-0.81) | -0.14 | 0.67 | 0.58 |
| DNER    | Start  | 9.62 (0.37) [12]  | 9.26 (0.49) [12]  | 0.72 (0.5-0.93)  | 9.67  | 0.83 | 0.50 |
| DNER    | End    | 9.89 (0.37) [12]  | 9.84 (0.67) [12]  | 0.55 (0.3-0.8)   | 10.09 | 0.50 | 0.83 |

|           |        |                   |                   |                  |       |      |      |
|-----------|--------|-------------------|-------------------|------------------|-------|------|------|
| DNER      | Change | -0.02 (0.03) [12] | -0.03 (0.03) [12] | 0.6 (0.37-0.84)  | -0.02 | 0.75 | 0.58 |
| EN RAGE   | Start  | 3.43 (1.31) [11]  | 4.01 (1.92) [11]  | 0.57 (0.32-0.82) | 5.94  | 0.27 | 1.00 |
| EN RAGE   | End    | 4.19 (1.57) [12]  | 5.59 (1.52) [12]  | 0.74 (0.53-0.94) | 3.31  | 1.00 | 0.42 |
| EN RAGE   | Change | -0.08 (0.17) [11] | -0.08 (0.12) [11] | 0.54 (0.28-0.8)  | -0.10 | 0.45 | 0.73 |
| CD40      | Start  | 9.48 (0.93) [12]  | 9.65 (0.86) [12]  | 0.53 (0.29-0.78) | 8.71  | 0.92 | 0.33 |
| CD40      | End    | 9.97 (0.6) [12]   | 10.3 (0.8) [12]   | 0.64 (0.4-0.88)  | 9.78  | 0.83 | 0.50 |
| CD40      | Change | -0.05 (0.11) [12] | -0.03 (0.07) [12] | 0.53 (0.28-0.77) | -0.05 | 0.42 | 0.75 |
| IFN gamma | Start  | 5.75 (1.04) [5]   | 5.51 (0.44) [6]   | 0.57 (0.1-1)     | 5.59  | 0.83 | 0.60 |
| IFN gamma | End    | 6.51 (1.25) [10]  | 5.94 (0.85) [10]  | 0.64 (0.38-0.9)  | 7.03  | 1.00 | 0.40 |
| FGF 19    | Start  | 5.8 (0.68) [12]   | 5.59 (0.91) [12]  | 0.57 (0.33-0.81) | 5.25  | 0.50 | 0.75 |
| FGF 19    | End    | 4.91 (0.28) [12]  | 4.76 (1.02) [12]  | 0.62 (0.35-0.89) | 4.47  | 0.50 | 1.00 |
| FGF 19    | Change | 0.06 (0.05) [12]  | 0.05 (0.1) [12]   | 0.51 (0.26-0.76) | 0.00  | 0.25 | 1.00 |
| LIF       | Start  | 7.41 (2.09) [12]  | 7.45 (2.73) [12]  | 0.51 (0.26-0.76) | 9.45  | 0.33 | 0.92 |
| LIF       | End    | 4.15 (1.45) [12]  | 4.84 (1.45) [12]  | 0.62 (0.39-0.86) | 3.81  | 0.83 | 0.50 |
| LIF       | Change | 0.21 (0.11) [12]  | 0.16 (0.17) [12]  | 0.59 (0.34-0.85) | 0.10  | 0.50 | 0.83 |
| MCP 2     | Start  | 7.95 (1.46) [12]  | 7.96 (1.54) [12]  | 0.51 (0.26-0.75) | 6.83  | 0.83 | 0.33 |
| MCP 2     | End    | 8.82 (1.07) [12]  | 8.74 (1.26) [12]  | 0.52 (0.27-0.77) | 8.93  | 0.58 | 0.67 |
| MCP 2     | Change | -0.09 (0.23) [12] | -0.04 (0.12) [12] | 0.51 (0.25-0.76) | 0.01  | 0.42 | 0.83 |
| CASP 8    | End    | 3.38 (0.84) [7]   | 3.62 (0.63) [8]   | 0.62 (0.3-0.95)  | 3.18  | 0.75 | 0.71 |
| CCL25     | Start  | 2.89 (0.38) [6]   | 2.75 (0.57) [5]   | 0.6 (0.19-1)     | 2.37  | 0.40 | 1.00 |
| TNFRSF9   | Start  | 3.77 (0.5) [9]    | 3.82 (0.54) [7]   | 0.54 (0.23-0.85) | 3.98  | 0.43 | 0.78 |
| TNFRSF9   | End    | 4.26 (0.47) [12]  | 4.49 (0.7) [12]   | 0.6 (0.36-0.84)  | 4.95  | 0.33 | 1.00 |
| TNFRSF9   | Change | -0.02 (0.04) [9]  | -0.03 (0.05) [7]  | 0.51 (0.18-0.84) | 0.00  | 0.43 | 0.89 |
| TWEAK     | Start  | 8.15 (0.69) [12]  | 8.06 (0.58) [12]  | 0.51 (0.27-0.76) | 8.98  | 1.00 | 0.17 |
| TWEAK     | End    | 8.5 (0.43) [12]   | 8.59 (0.76) [12]  | 0.65 (0.4-0.89)  | 8.34  | 0.83 | 0.50 |
| TWEAK     | Change | -0.03 (0.06) [12] | -0.03 (0.04) [12] | 0.58 (0.34-0.83) | -0.05 | 0.58 | 0.75 |

|        |        |                   |                   |                  |       |      |      |
|--------|--------|-------------------|-------------------|------------------|-------|------|------|
| CCL20  | Start  | 8.1 (2.14) [12]   | 8.88 (2.27) [12]  | 0.58 (0.34-0.82) | 8.69  | 0.50 | 0.75 |
| CCL20  | Change | 0.13 (0.09) [11]  | 0.04 (0.17) [12]  | 0.7 (0.47-0.93)  | 0.02  | 0.50 | 1.00 |
| ST1A1  | Start  | 3.74 (0.75) [6]   | 4.46 (1.02) [5]   | 0.83 (0.5-1)     | 4.56  | 0.80 | 1.00 |
| STAMBP | Start  | 3.43 (1.75) [12]  | 3.94 (1.62) [12]  | 0.68 (0.45-0.91) | 2.84  | 0.83 | 0.58 |
| STAMBP | End    | 2.77 (0.73) [10]  | 2.92 (0.61) [12]  | 0.56 (0.3-0.82)  | 2.46  | 0.83 | 0.40 |
| STAMBP | Change | 0.05 (0.1) [10]   | 0.06 (0.09) [12]  | 0.57 (0.31-0.82) | -0.01 | 0.83 | 0.40 |
| ADA    | Start  | 5.08 (1.41) [12]  | 5.27 (1.3) [12]   | 0.6 (0.36-0.84)  | 4.13  | 0.92 | 0.33 |
| ADA    | End    | 5.29 (0.85) [12]  | 5.89 (0.97) [12]  | 0.67 (0.44-0.9)  | 5.96  | 0.58 | 0.83 |
| ADA    | Change | -0.02 (0.08) [12] | -0.03 (0.07) [12] | 0.56 (0.31-0.8)  | 0.01  | 0.92 | 0.33 |
| TNFB   | End    | 3.01 (0.59) [12]  | 3.03 (0.54) [9]   | 0.51 (0.25-0.77) | 2.55  | 0.89 | 0.33 |
| CSF 1  | Start  | 9.03 (0.58) [12]  | 8.67 (0.48) [12]  | 0.66 (0.43-0.89) | 8.99  | 0.75 | 0.58 |
| CSF 1  | End    | 8.72 (0.54) [12]  | 8.7 (0.7) [12]    | 0.55 (0.31-0.79) | 8.19  | 0.83 | 0.33 |
| CSF 1  | Change | 0.02 (0.04) [12]  | 0 (0.05) [12]     | 0.68 (0.45-0.91) | 0.00  | 0.67 | 0.75 |
